# Supplementary material
Source: HighWire-hosted journal article supplement (https://qualitysafety.bmj.com/content/30/12/937)
Supplement: inline-supplementary-material-2 [file inline-supplementary-material-2.pdf]

**Supplementary Appendix 2.** Composite indicator of 14 safety and teamwork and communication indicators on the Surgical Safety Checklist<sup>10</sup>

Patient safety process adherence:

1. Use of pulse oximetry at the time of initiation of anaesthesia
2. Administration of prophylactic antibiotics within 60 minutes before incision
3. Oral confirmation, immediately before incision, of the identity of the patient, operative site, and procedure to be performed
4. Completion of an instrument, sponge and needle count at the end of the procedure
5. Appropriate operative site cleansing (skin preparation with chlorhexidine-alcohol or iodine-based solution)
6. Vaginal preparation with povidone-iodine

Teamwork and communication discussion adherence:

7. Rate of eight discussion items on risk for airway difficulty/aspiration
8. Risk of blood loss
9. Surgical provider's discussion on patient-specific concerns
10. Anaesthetist's discussion on patient-specific concerns
11. Sterility of instruments and equipment
12. Anticipated procedure level of difficulty and duration
13. Equipment/instrument problems that arose during surgery
14. Patient's post-operative recovery
